# Supplementary material
Source: PubMed Central journal article supplement (PMC2750850)
Supplement: NIHMS142512-supplement-1_si_001.pdf [file NIHMS142512-supplement-1_si_001.pdf]

## **Supporting information**

### **Experimental**

#### **Materials**

Optical fiber bundles (1.4 mm-diameter) containing ~50,000- 3.1 micron diameter fibers were obtained from Schott Fiber Optics, Inc. (Southbridge, MA). Lapping films for fiber polishing were purchased from Allied High-Tech Products (Rancho Dominguez, CA). Amine-modified methylstyrene-divinylbenzene polymer microspheres (3.1- $\mu\text{m}$  diameter) were purchased from Bangs Laboratories, Inc. (Carmel, IN). All oligonucleotide probes used in this study were synthesized by Integrated DNA Technologies, Inc. (Coralville, IA). Europium (III) theonyltrifluoroacetate-3H<sub>2</sub>O (Eu-dye) was obtained from Acros Organics (Morris Plains, NJ). Sterile water used to reconstitute oligonucleotide probes was purchased from Abbott Laboratories (North Chicago, IL). Tetrahydrofuran (THF), methanol (MeOH), glutaraldehyde (8% aqueous solution), and avidin were purchased from Sigma-Aldrich (St. Louis, MO). Tris-Starting Block, PBS Starting Block Tween-20, and Protein free (PBS) blocking buffers were purchased from Pierce Biotechnology (Rockford, IL). All reagents were used without further purification. Mouse monoclonal capture antibodies (Abs) directed against human IL-8 (clone 6217), recombinant human IL-8, and biotinylated polyclonal anti-human IL-8 antibodies were obtained from R&D Systems, Inc. (Minneapolis, MN).

#### **Microsphere encoding**

Every microsphere on the array is encoded with a unique optical barcode comprised of Eu dye incorporated into each microsphere and then decoded using image-processing techniques to allow positional registration of the entire array (Figure 3 A and B (1)). Encoded microspheres were prepared from 50  $\mu\text{L}$  (5 mg) aliquots of a 3.1  $\mu\text{m}$  amine-functionalized microsphere stock. The aliquots were washed in triplicate with 200  $\mu\text{L}$  PBS and were then washed in triplicate with 200  $\mu\text{L}$  THF. A 200  $\mu\text{L}$  solution of 0.5 M Eu-dye in THF was then added, and the microsphere suspension was shaken in the dark for 2 h at room temperature (RT). The reaction vessel was centrifuged, and the microsphere pellet was washed six times with 200  $\mu\text{L}$  MeOH and then washed six times with 300  $\mu\text{L}$  PBS (0.154 M NaCl, 2.7 mM KCl, 10 mM sodium phosphate and 1.7 mM potassium phosphate, pH 7.4). The encoded microspheres were then suspended in 500  $\mu\text{L}$  PBS with 0.01% Tween-20 and stored at 4 °C in the dark.

#### **Preparation of sensors**

A 100  $\mu\text{L}$  aliquot (1 mg) of the encoded microsphere suspension was centrifuged, the supernatant was removed, 1 mL of 8% glutaraldehyde in PBS was added, and then the mixture was shaken at RT for 2 h in the dark. The microspheres were then washed three times with 300  $\mu\text{L}$  of PBS. Subsequently, 45.3  $\mu\text{g}$  of IL-8 monoclonal capture antibodies were added to 1 mg of the glutaraldehyde-activated microspheres (encoded 0.5 M Eu-dye, respectively) suspended in 500  $\mu\text{L}$  PBS.

The microcentrifuge tube containing the mixture was covered with aluminum foil and shaken at RT for 4 h. The microspheres were washed once with 300  $\mu\text{L}$  Tris-Starting Block (blocking buffer), and then were suspended in 300  $\mu\text{L}$  blocking buffer. The suspension was shaken at RT for 30 min in the dark, and then washed once with 300  $\mu\text{L}$

blocking buffer. The microsphere probes were suspended and stored in 100  $\mu$ L blocking buffer at 4° C, protected from light.

### **Microarray Fabrication**

The ends of the optical fiber bundles were sequentially polished with 30, 15, 6, 3, 1, 0.5, and 0.05  $\mu$ m lapping films. The fiber bundles were then sonicated in water for 10 s to remove residue on the finished ends. One end of the polished fiber bundle was chemically etched to form microwells as described previously.<sup>33</sup> Etched fibers were thoroughly rinsed with Nanopure water. The etched end of the fiber bundle was blocked with 200  $\mu$ L Protein free (PBS) blocking buffer for 30 min. Anti-IL-8 (encoded with 0.5 M Eu-dye) microspheres were loaded into the array by pipetting a 0.5  $\mu$ L aliquot onto the etched end of the fiber, and allowing the solution to dry for 10 min. The end of the fiber containing the microspheres was then blocked a second time with 200  $\mu$ L Starting Block Tween-20 (PBS) blocking buffer for 30 min at RT. The fiber was incubated in 100  $\mu$ L of Starting Block Tween-20 (PBS) buffer containing 10 nM of IL-8 protein, for 2 h, and then rinsed with 1mL Starting Block (PBS) Tween-20 buffer. The fiber was subsequently incubated with 100  $\mu$ L of a solution containing of 3  $\mu$ g/mL of biotinylated detection antibody (anti-IL-8) for 30 min and then rinsed with 1 mL of Starting Block Tween-20 (PBS) buffer. After incubation in PBS solution containing avidin (20  $\mu$ g/ml) for 45 min, the fiber was rinsed with 1 mL of PBS. Subsequently, the fiber was incubated in PBS solution containing 10  $\mu$ M of biotinylated capture DNA probes for 45 min at RT and then rinsed with 1 mL of PBS. The AND gate microarray was then incubated in PBS solution containing 50  $\mu$ M of target DNA for 1h at RT and then rinsed with 1 mL of PBS.

In order to employ presented array for protein-DNA and single protein detections, two fluorescent-labeled signal probes were designed for the detection step. Fibers were incubated with 1  $\mu$ M of the mix solution of Cy3 and Cy5 - labeled signal probes in 50 nM of PBS for 30 min at RT. After incubation, the fiber bundle end was washed once using 1 mL of PBS. Finally, the array was imaged using an epi-fluorescence microscope.

### **Signal processing**

A minimum of 30 beads on each of the fiber surfaces were averaged for each measurement. A pre-set signal threshold, show as a line in Figure 2C and D was defined as the average measurement of three negative control fiber arrays (buffer sample including all assay reagents excluding analytes; target DNA and protein for AND gate and IL-8 protein for INHIBIT gate) +3x standard deviation (SD). Any net signal greater than this threshold was considered a positive response (output 1) while any net signal bellow than this threshold was considered a negative response (output 0).

### **Imaging system**

A custom-built epi-fluorescence imaging system was used to acquire all fluorescence images. The system included a mercury light source, excitation and emission filter wheels (Chroma, Rockingham, VT), microscope objectives (Olympus, Center Valley, PA), and a CCD camera (Orca-ER, Hamamatsu). Filter wheels and shutters were computer-controlled and analysis was performed with IPLab software (Scanalytics, Fairfax, VA). The system was equipped with a chuck to immobilize the fiber-optic bundle. After the microspheres were loaded onto the fiber optic bundle, their

locations on the array were registered using their unique optical barcode that consisted of a defined level of Eu-dye (excitation 360 nm/emission 600 nm) (Figure 3A and B (1)). Cy3 fluorescence (excitation 550 nm/ emission 570 nm) and Cy5 (excitation 649nm/ emission 670 nm) fluorescence (Figure 3A (2) and B (3)) was monitored to evaluate the microsphere assay. Fluorescence intensity values were acquired for encoding, background, and signal images using a 200 ms image exposure time and 20 x magnification. The images were analyzed with IPLab software.
